# Supplementary material for: NO x emissions changes from 2019 to 2021 in Eastern China as estimated through variational inversions and TROPOMI satellite data
Source: Copernicus journal article supplement (doi:10.5194/egusphere-2025-3329), 2025-07-17
Supplement: Supplementary file 1 [file NOx_emissions_estimates_2019_to_2021_in_Chinese_provinces.xlsx]

## Sheet: Sheet1
Values are in kteq(NO2) per month, and are the posterior estimates
*19, 20, and 21 refer to 2019, 2020 and 2021 respectively
**XX-19 = NOx emissions in 20XX - NOx emissions in 2019 (for XX=20 or 21)
We excluded 4 provinces that are shown in the study domain, because of the scarcity of data
	NOx total 2019	NOx total 2020	NOx total 2021	Jan			rel. Diff.		Feb			rel. Diff.		Mar			rel. Diff.		Apr			rel. Diff.		May			rel. Diff.		Jun			rel. Diff.		Jul			rel. Diff.		Aug			rel. Diff.		Sep			rel. Diff.		Oct
				19*	20*	21*	20-19**	21-19**	19	20	21	20-19	21-19	19	20	21	20-19	21-19	19	20	21	20-19	21-19	19	20	21	20-19	21-19	19	20	21	20-19	21-19	19	20	21	20-19	21-19	19	20	21	20-19	21-19	19	20	21	20-19	21-19	19
Inner Mongol	1063.26	1048.63	1113.87	77.78	72.15	84.76	-7.23836	8.97403	59.92	52.32	66.23	-12.6836	10.5307	78.27	75.85	84.68	-3.09186	8.1896	88.47	82.63	91.07	-6.60111	2.93885	104.33	102.65	108.07	-1.61028	3.58478	105.09	105.38	110.78	0.275954	5.41441	107.68	106.18	115.33	-1.39302	7.10438	100.66	102.08	105.64	1.41069	4.94735	92.04	91.93	93.11	-0.119513	1.16254	88.75
Gansu	301.2	300.85	315.41	21.05	19.82	21.05	-5.84323	0	19.11	15.18	19.21	-20.5651	0.523286	23.19	22.66	25.13	-2.28547	8.36567	26	24.08	28.89	-7.38462	11.1154	29.24	29.28	30.97	0.136799	5.91655	29.42	30.5	32.37	3.67097	10.0272	31.09	31.34	33.49	0.804117	7.71952	29.09	30.39	31.25	4.46889	7.42523	26.87	28.28	27.78	5.24749	3.38668	26.29
Yunnan	360.64	350.07	374.47	29.71	27.73	31.94	-6.66442	7.50589	26.44	20.71	26.47	-21.6717	0.113464	31.18	27.87	34.01	-10.6158	9.07633	30.21	28.74	32.07	-4.86594	6.1569	30.86	29.62	33.2	-4.01815	7.58263	30.53	30.84	32.55	1.01539	6.61644	32.52	32.24	33.37	-0.861009	2.61378	31.83	32.16	32.56	1.03676	2.29343	30.43	30.99	31.15	1.84029	2.36609	30.79
Heilongjiang	507.22	524.06	558.14	40.16	44.15	47.85	9.93526	19.1484	30.81	31.37	40.39	1.81759	31.0938	33.16	36.49	42.63	10.0422	28.5585	39.64	39.02	44.13	-1.56408	11.3269	46.29	47.63	50.74	2.89479	9.61331	48.78	49.08	51.41	0.615006	5.39155	50.14	49.68	53.17	-0.917431	6.04308	44.86	49.19	49.54	9.65225	10.4325	43.21	44.91	45.22	3.93427	4.6517	44.95
Jilin	335.05	345.48	367.42	24.07	26.8	29.41	11.3419	22.1853	18.28	19.97	24.92	9.24508	36.3239	22.32	24.64	27.47	10.3943	23.0735	26.73	26.41	29.6	-1.19716	10.737	31.25	32.6	34.53	4.32	10.496	34.32	34.19	35.7	-0.378788	4.02098	34.49	34.16	36.6	-0.956799	6.11772	31.22	33.79	33.86	8.2319	8.45612	29.62	30.21	30.61	1.9919	3.34234	29.44
Liaoning	709.05	720.87	786.96	45.59	47.59	54.14	4.38693	18.7541	37.2	39.76	51.19	6.88172	37.6075	46.05	53.56	58.31	16.3084	26.6232	56.41	51.6	64.28	-8.52686	13.9514	66.31	70.7	78.52	6.62042	18.4135	78.17	84.28	83.22	7.8163	6.46028	79.71	68.97	99.46	-13.4738	24.7773	59.49	71.56	68.14	20.2891	14.5403	63.06	59.96	60.88	-4.91595	-3.45703	70.32
Guangxi	594.83	578.96	613.81	50.29	46.84	53.52	-6.86021	6.42275	44.23	35.7	43.74	-19.2856	-1.10785	51.17	45.8	54.54	-10.4944	6.58589	48.94	47.04	51.17	-3.8823	4.5566	51.49	49.34	53.77	-4.17557	4.42804	50.76	50.62	53.15	-0.275808	4.70843	52.57	51.91	53.98	-1.25547	2.68214	50.24	50.28	52.57	0.0796178	4.63774	49.22	50.46	50.92	2.5193	3.45388	51.15
Guangdong	823.32	823.05	865.07	66.78	63.88	76.12	-4.34262	13.9862	53.06	48.24	59.02	-9.08406	11.2326	70.84	68.72	78.17	-2.99266	10.3473	68.43	68.62	69.96	0.277656	2.23586	70.47	68	74.13	-3.50504	5.1937	72.96	74.34	78.7	1.89145	7.86732	77.07	75.24	84.47	-2.37446	9.60166	68.72	67.29	74.14	-2.08091	7.88708	69.51	67.85	69.46	-2.38815	-0.0719321	73.53
Fujian	379.8	380.49	403.83	31.8	30.55	35.67	-3.93082	12.1698	26.87	23.18	28.78	-13.7328	7.1083	32.9	29.89	36.94	-9.14894	12.2796	31.02	31.22	33.58	0.644745	8.25274	33.32	32.93	36.14	-1.17047	8.46339	31.98	33.09	35.12	3.47092	9.81864	33.93	34.09	35.53	0.471559	4.71559	31.29	33.48	34.54	6.99904	10.3867	31.37	32.54	33.47	3.72968	6.69429	33.01
Zhejiang	469.89	461.24	489.46	37.61	34.63	39.05	-7.92342	3.82877	35.25	26.57	33.31	-24.6241	-5.50355	41.41	37.59	45.18	-9.22482	9.10408	42.31	40.32	42.85	-4.70338	1.27629	42.59	42.58	46.77	-0.0234797	9.81451	42.51	42.16	45.08	-0.823336	6.04564	43.06	43.52	45.82	1.06828	6.40966	38.01	41.12	42.23	8.18206	11.1023	37.77	41.97	40.28	11.1199	6.64549	40.45
Shanghai	233.85	235.79	253.28	18.74	17.6	19.13	-6.08324	2.08111	20.97	13.07	16.18	-37.6729	-22.8422	21.17	21.55	25.52	1.79499	20.5479	24.86	20.48	23.58	-17.6187	-5.14883	21.11	22.55	26.35	6.82141	24.8224	22.97	23.8	26.7	3.61341	16.2386	21.13	25.29	30.57	19.6876	44.6758	14.56	18.13	18.52	24.5192	27.1978	13.78	21.19	16.13	53.7736	17.0537	20.96
Jiangsu	972.79	940.39	994.49	77.37	71.13	75.82	-8.06514	-2.00336	77.04	52.25	63.26	-32.1781	-17.8868	86.69	79.19	94.52	-8.65152	9.03218	91.93	80.68	87.59	-12.2376	-4.72098	92.07	91.94	100.22	-0.141197	8.85196	92.44	90.26	99.07	-2.35829	7.17222	89.74	92.73	100.17	3.33185	11.6225	73.27	81.13	84.24	10.7274	14.972	70.77	83.51	77.3	18.002	9.22707	83.96
Shandong	1161.01	1122.34	1166.01	88.02	75.24	84.13	-14.5194	-4.41945	79.01	62.1	72.35	-21.4024	-8.42931	101.97	91.34	104.82	-10.4246	2.79494	106.14	97.75	101.46	-7.90465	-4.40927	112.55	112.41	117.1	-0.124389	4.04265	112.86	111.07	117.29	-1.58604	3.92522	110.52	108.97	113.95	-1.40246	3.10351	92.03	102.46	106.02	11.3333	15.2016	93.42	93.35	98.13	-0.0749304	5.04175	100.04
Hebei	911.82	892.38	913.63	66.56	57.27	65.06	-13.9573	-2.25361	55.18	46.12	53.83	-16.419	-2.44654	71.51	69.87	76.6	-2.29339	7.11789	84.3	79.18	78.74	-6.07355	-6.59549	88.09	86.08	88.53	-2.28176	0.499489	91.44	91.72	93.45	0.306212	2.19816	91.29	88.87	93.44	-2.65089	2.35513	78.32	83.79	84.74	6.98417	8.19714	76.66	75.83	78.12	-1.0827	1.90451	77.89
Tianjin	138.65	134.23	136.18	9.61	7.8	9.06	-18.8345	-5.7232	7.88	6.38	7.5	-19.0355	-4.82234	10.39	10.52	10.85	1.2512	4.42733	13.8	12.36	11.97	-10.4348	-13.2609	14.04	13.3	13.58	-5.27066	-3.27635	14.68	14.98	15.06	2.0436	2.58856	14.85	13.96	15.14	-5.99327	1.95286	10.92	12.29	11.83	12.5458	8.33333	10.82	11.14	11.42	2.95749	5.54529	12.22
Beijing	242	241.31	249.1	17.16	14.37	16.64	-16.2587	-3.0303	13.06	10.96	13.15	-16.0796	0.689127	17.98	18.5	19.41	2.8921	7.95328	23.99	20.89	21.36	-12.9221	-10.9629	23.58	23.5	24.48	-0.339271	3.81679	25.84	27.09	27.91	4.83746	8.01084	26.44	25.85	28.56	-2.23147	8.01815	19.49	21.76	21.63	11.647	10.98	17.69	19.63	20.86	10.9666	17.9197	21.75
Chongqing	291.49	287.84	300.46	24.69	22.77	25.64	-7.77643	3.84771	21.35	16.9	21.21	-20.8431	-0.655738	24.43	22.2	25.96	-9.12812	6.26279	25.42	24.6	26.93	-3.22581	5.9402	26.27	25.96	28.07	-1.18005	6.85192	25.43	25.63	26.95	0.786473	5.97719	26.42	26.43	27.22	0.0378501	3.02801	25.3	26.12	26.53	3.24111	4.86166	23.93	25.76	24.97	7.6473	4.34601	24.67
Guizhou	377.47	375.51	398.55	31.68	30.38	34.81	-4.10354	9.88005	27.85	23.43	27.95	-15.8707	0.359066	32.29	29.59	35.65	-8.36172	10.4057	32.04	31.22	34.33	-2.5593	7.14732	33.02	33.11	35.85	0.272562	8.57056	32.25	33.03	35.14	2.4186	8.96124	33.84	33.89	35.54	0.147754	5.02364	32.88	34.15	34.72	3.86253	5.59611	31.41	32.51	32.92	3.50207	4.80739	31.89
Hunan	614.04	604.96	634.34	53.49	50.13	54.15	-6.28155	1.23388	47.15	37.22	44.84	-21.0604	-4.89926	52.92	47.18	56.61	-10.8466	6.97279	52.26	50.66	55.9	-3.06162	6.96517	54.32	53.88	57.73	-0.810015	6.27761	52.63	52.92	56.13	0.551017	6.6502	54.56	54.53	56.37	-0.0549853	3.31745	49.9	52.93	54.96	6.07214	10.1403	50.12	53.59	53.08	6.92338	5.90583	52.92
Ningxia	149.87	149.45	161.57	9.53	9.61	11.4	0.839454	19.6222	7.61	7.08	9.25	-6.96452	21.5506	10.4	10.79	12.21	3.75	17.4038	13.48	11.27	15.13	-16.3947	12.2404	15.31	15.12	16.67	-1.24102	8.88308	15.34	15.74	16.53	2.60756	7.7575	15.23	15.52	17.32	1.90414	13.7229	14	14.92	15.74	6.57143	12.4286	13.29	13.63	13.17	2.55831	-0.902935	13.85
Shaanxi	439.06	433.43	451.68	34.39	31.99	34.67	-6.97877	0.81419	29.39	24.23	29.35	-17.557	-0.136101	34.99	33.41	38.99	-4.51558	11.4318	37.65	36	39.67	-4.38247	5.36521	41.69	40.49	43.7	-2.87839	4.8213	40.43	40.6	42.58	0.42048	5.31783	41.3	41.27	43.13	-0.0726392	4.43099	38.72	40.98	41.81	5.83678	7.98037	38.41	39.27	39.52	2.239	2.88987	38.32
Shanxi	700.09	689.06	723.04	52.02	45.08	51.33	-13.341	-1.32641	42.32	35.39	42.48	-16.3752	0.378072	55.4	54.77	63.32	-1.13718	14.296	64.58	60.71	63.09	-5.99257	-2.30722	69.22	67.86	71.67	-1.96475	3.53944	67.74	68.66	72.17	1.35813	6.53971	67.35	66.22	72.96	-1.6778	8.32962	61.57	65.03	66.94	5.61962	8.72178	59.15	59.72	62.08	0.963652	4.95351	60.73
Jiangxi	410.91	409.39	431.15	34.69	33.35	36.79	-3.86278	6.05362	31.55	24.97	30.23	-20.8558	-4.18384	35.17	32.21	38.6	-8.41626	9.75263	35.27	34.29	37.77	-2.77857	7.08818	36.76	36.85	39.6	0.244831	7.72579	35.55	35.85	38	0.843882	6.8917	36.74	36.85	38.39	0.299401	4.49102	32.92	36.03	37.19	9.44714	12.9708	33.37	35.93	35.98	7.67156	7.8214	35.39
Henan	869.91	846.16	884.58	68.65	59.23	65.1	-13.7218	-5.17116	58.92	44.76	55.7	-24.0326	-5.46504	66.7	64.44	76.35	-3.38831	14.4678	79.8	70.02	75.31	-12.2556	-5.62657	81.76	81.44	86.02	-0.391389	5.21037	86.33	87.36	89.91	1.1931	4.14688	86.09	85.72	91.02	-0.429783	5.72657	74.27	80.63	84.44	8.56335	13.6933	72.11	75.91	75.59	5.26973	4.82596	76.88
Hubei	854.13	854.95	919.32	73.47	71.55	72.86	-2.61331	-0.830271	76.41	48.51	61.89	-36.5135	-19.0027	67.68	66.46	84.82	-1.8026	25.3251	77.17	69.9	90.24	-9.42076	16.9366	80.89	81.72	91.25	1.02608	12.8075	79.99	80.45	85.53	0.575072	6.92587	79.52	80.3	93.25	0.980885	17.2661	62.67	71.71	83.94	14.4248	33.9397	62.38	77.38	69.98	24.0462	12.1834	72.62
Anhui	693.04	678.58	712.2	55.26	53.06	54.76	-3.98118	-0.904814	54.85	38.66	46.9	-29.5169	-14.4941	58.58	54.81	65.16	-6.43564	11.2325	62.99	57.05	62.34	-9.43007	-1.03191	65.3	65.75	70.84	0.689127	8.48392	64.7	63.48	68.96	-1.88563	6.58423	64.82	65.11	67.99	0.447393	4.89047	55.85	61.86	64.85	10.761	16.1146	55	60.99	60.03	10.8909	9.14545	59.69
Total	14604.4	14429.5	15218
[truncated: 14 more columns]
