# Supplementary material for: NO x emissions changes from 2019 to 2021 in Eastern China as estimated through variational inversions and TROPOMI satellite data
Source: Copernicus journal article supplement (doi:10.5194/egusphere-2025-3329), 2025-07-17
Supplement: Supplementary file 2 [file supplementary.pdf › supplementary.pdf]

Supplementary materials

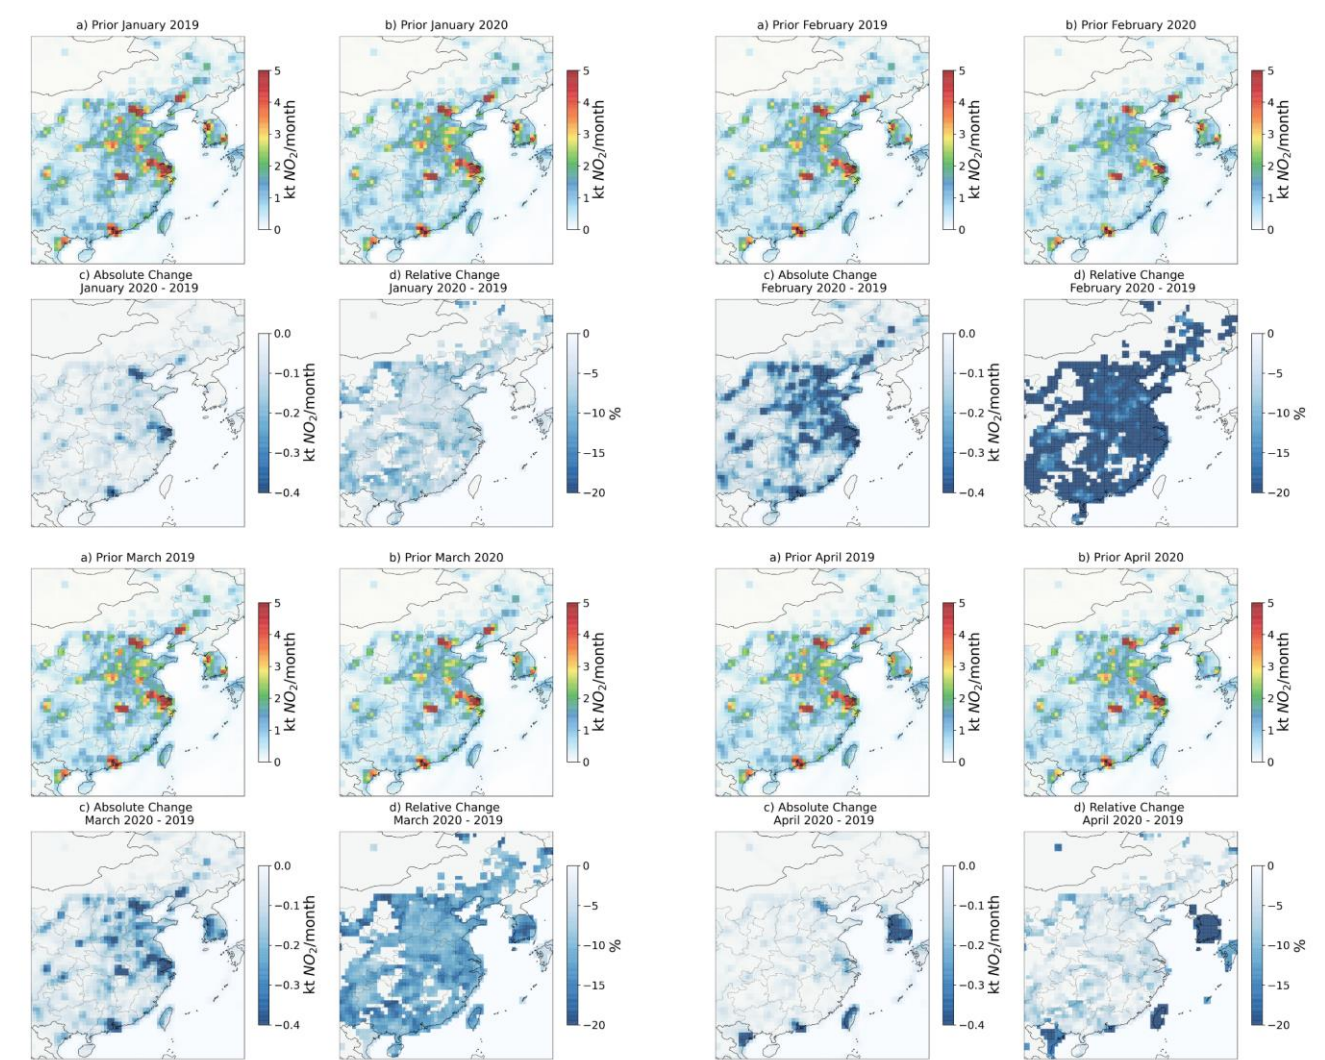

**Figure S1.** Prior estimates of the NO<sub>x</sub> total( anthropogenic+biogenic) emissions for 2019 (a) and 2020 (b), and the absolute (c) and relative (d) change between these estimates, expressed in kt NO<sub>2</sub>/month (a to c) and in percentage % (d). The plots shown here are for **January** to **April**. Values below 0.3 kt NO<sub>2</sub> in the prior estimate for February 2019 were set to zero when calculating the relative difference (d) to reduce the noise in the figure.

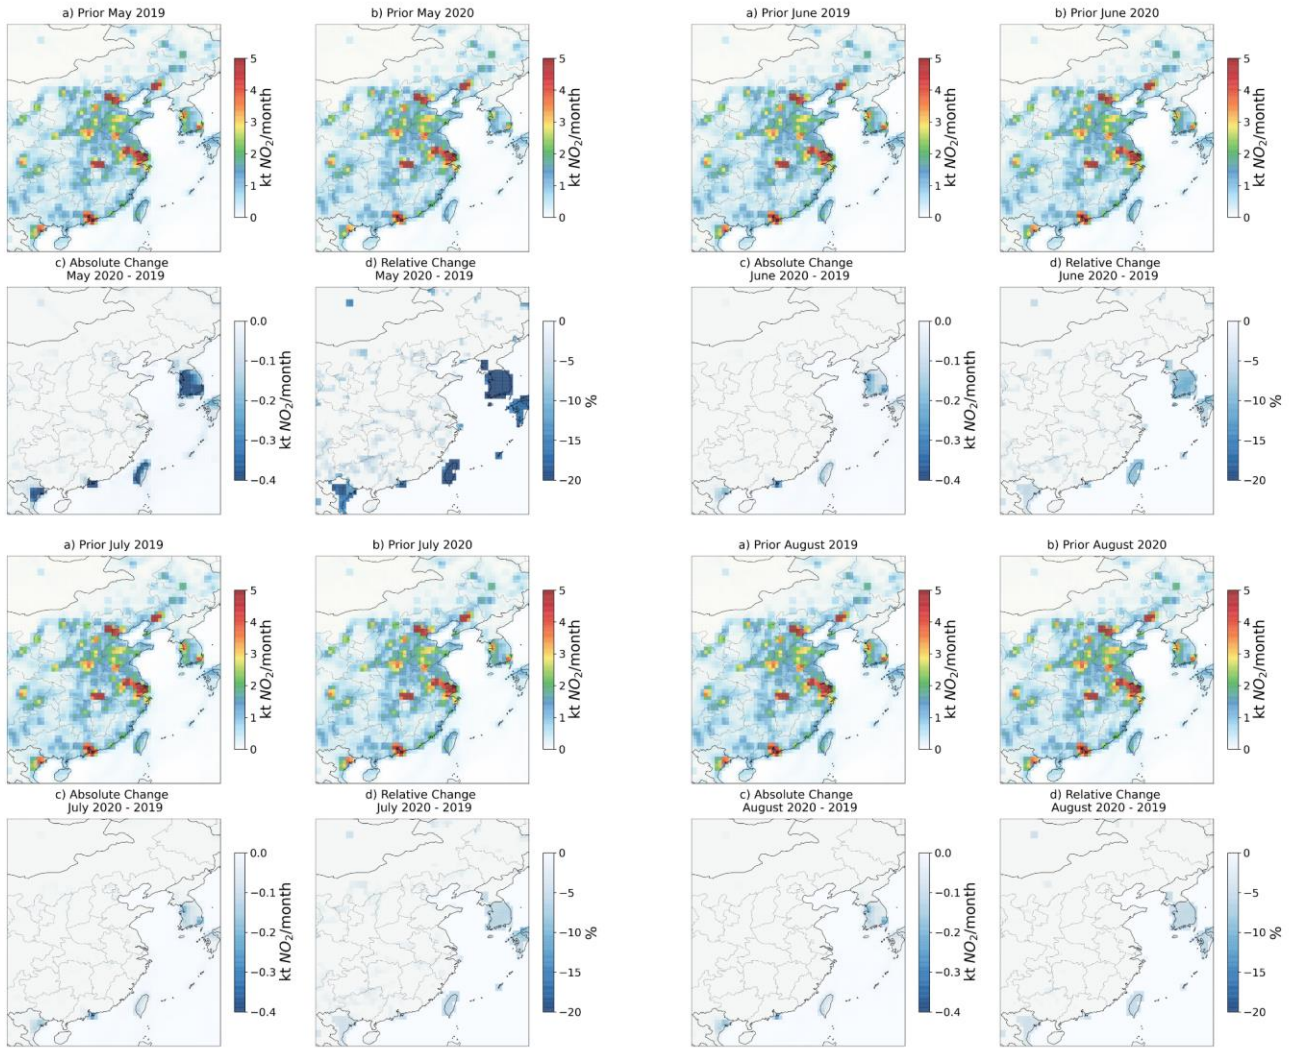

15 **Figure S2.** Prior estimates of the NO<sub>x</sub> total ( anthropogenic + biogenic) emissions for 2019 (a) and 2020 (b), and the absolute (c) and relative (d) change between these estimates, expressed in kt NO<sub>2</sub>/month (a to c) and in percentage % (d). The plots shown here are for **May** to **August**. Values below 0.3 kt NO<sub>2</sub> in the prior estimate for February 2019 were set to zero when calculating the relative difference (d) to reduce the noise in the figure.

20

25

30



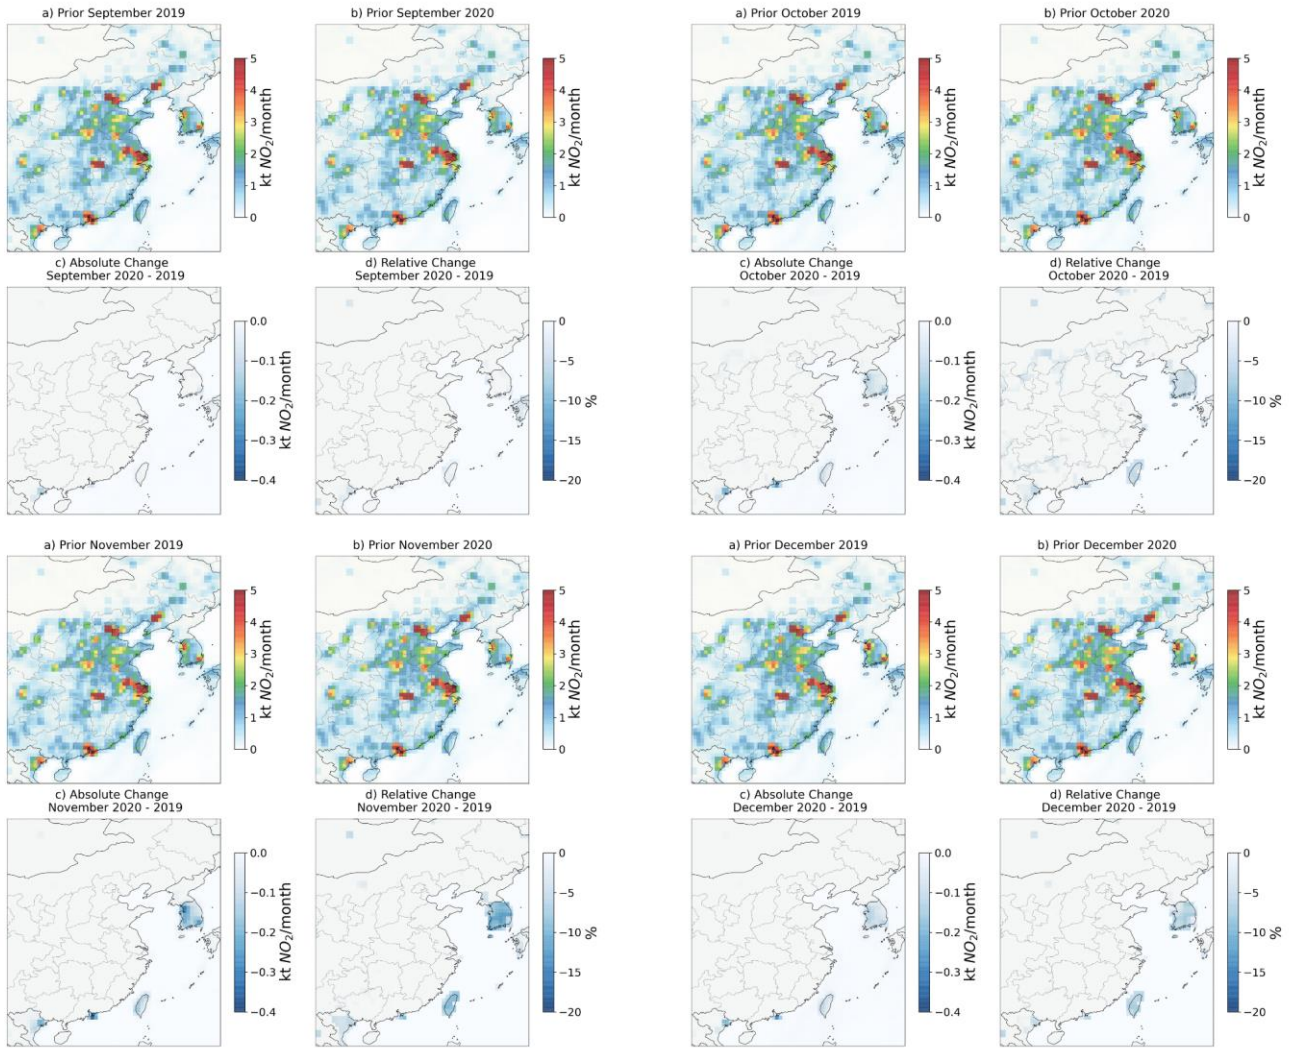

**Figure S3.** Prior estimates of the NO<sub>x</sub> total ( anthropogenic + biogenic) emissions for 2019 (a) and 2020 (b), and the absolute (c) and relative (d) change between these estimates, expressed in kt NO<sub>2</sub>/month (a to c) and in percentage % (d). The plots shown here are for **September** to **December**. Values below 0.3 kt NO<sub>2</sub> in the prior estimate for February 2019 were set to zero when calculating the relative difference (d) to reduce the noise in the figure.

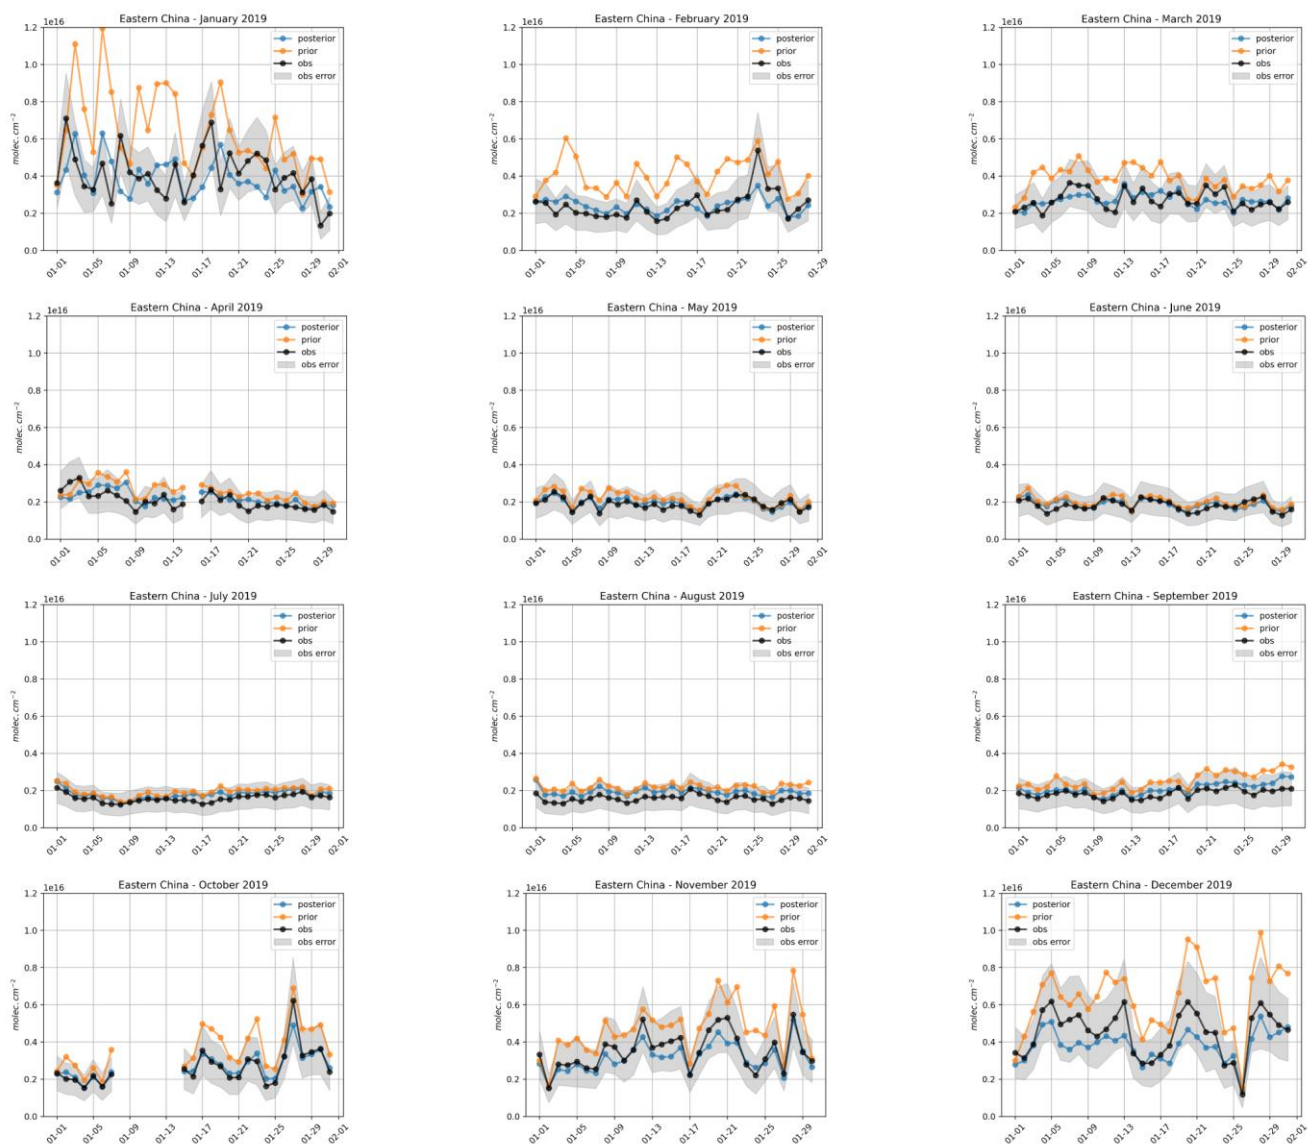

**Figure S4.** Daily mean posterior (blue) and prior (orange) estimations of NO<sub>2</sub> TVCDs as compared to that of the TROPOMI super-observations (obs, black) during 2019, (January to December from left to right, top to bottom), with the 1-sigma error associated to the super-observations as a grey shaded area (obs error). The top row features averages for Eastern China (a) and the province of Jilin (b), and the bottom row shows averages for the provinces of Beijing (c) and Shanghai (d). The NO<sub>2</sub> TVCDs are expressed in molecules.cm<sup>-2</sup>. Note that the y axis limits are different for the provinces as compared to Eastern China. The provinces are shown in Figure 1 on the map of the domain.

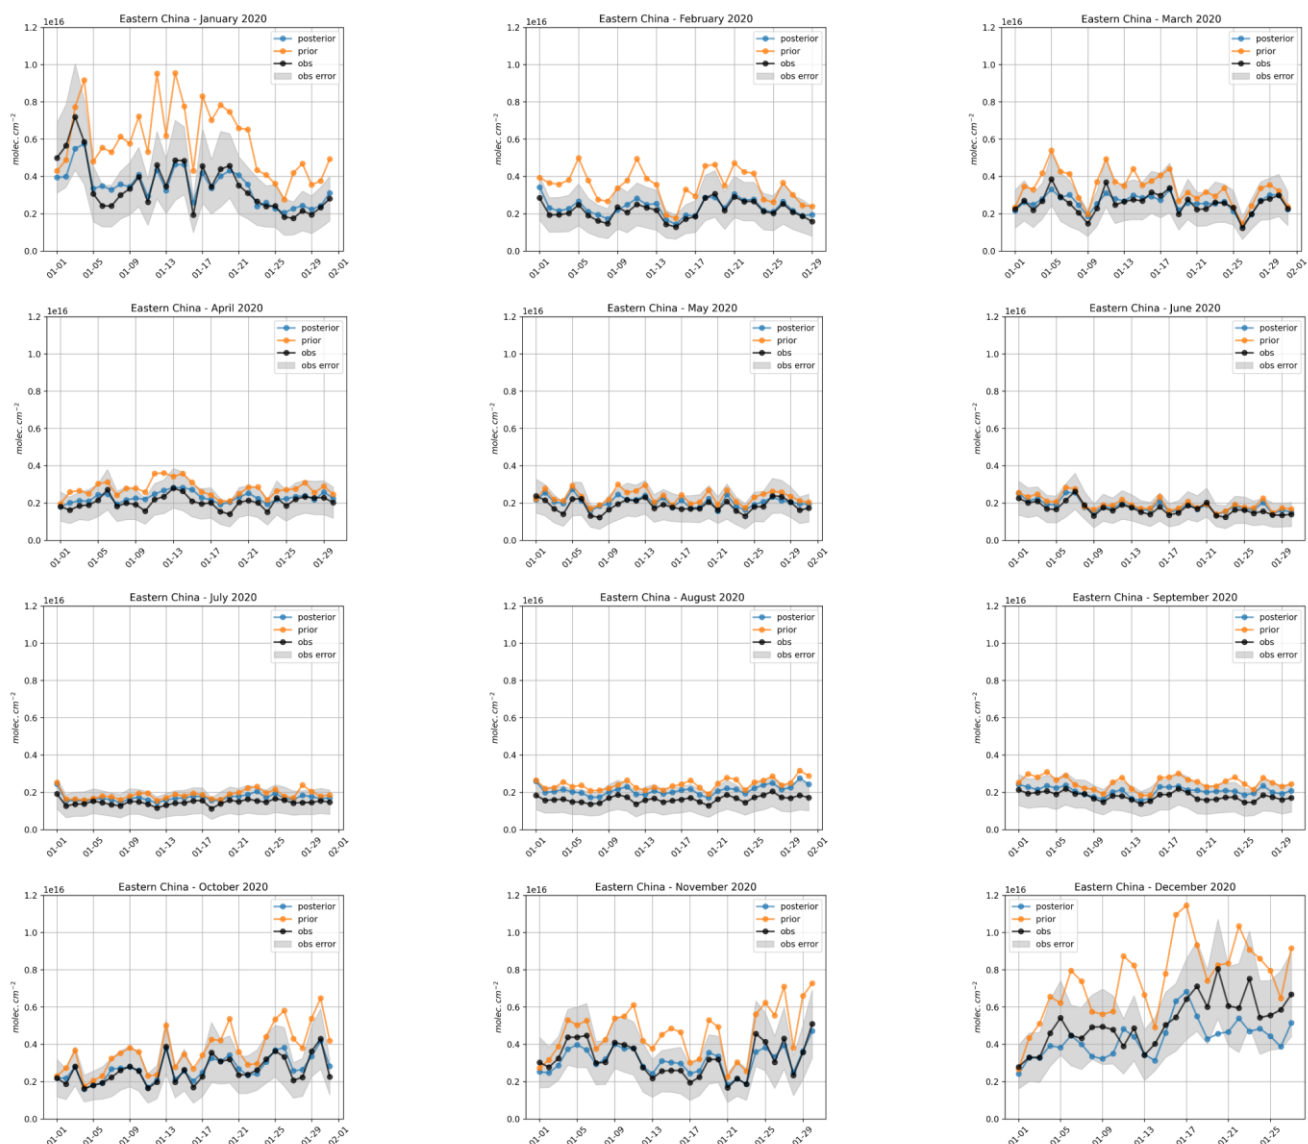

55 **Figure S5.** Daily mean posterior (blue) and prior (orange) estimations of NO<sub>2</sub> TVCDs as compared to that of the TROPOMI  
super-observations (obs, black) during 2020, (January to December from left to right, top to bottom), with the 1-sigma error  
associated to the super-observations as a grey shaded area (obs error). The top row features averages for Eastern China (a)  
and the province of Jilin (b), and the bottom row shows averages for the provinces of Beijing (c) and Shanghai (d). The  
60 NO<sub>2</sub> TVCDs are expressed in molecules.cm<sup>-2</sup>. Note that the y axis limits are different for the provinces as compared to  
Eastern China. The provinces are shown in Figure 1 on the map of the domain.

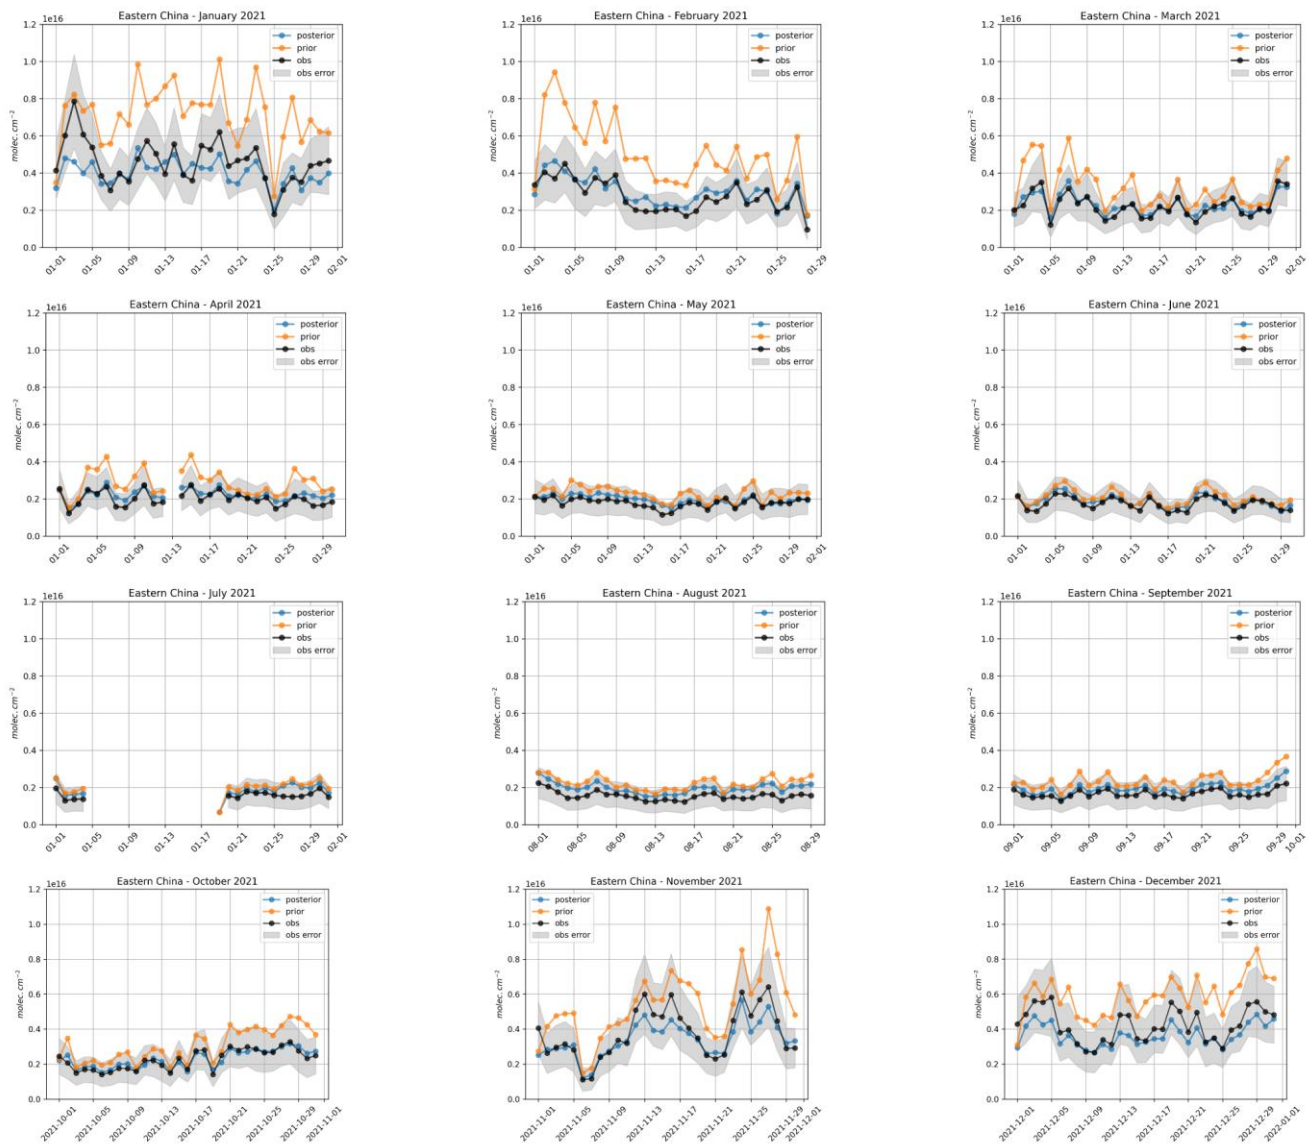

**Figure S6.** Daily mean posterior (blue) and prior (orange) estimations of NO<sub>2</sub> TVCDs as compared to that of the TROPOMI super-observations (obs, black) during 2021, (January to December from left to right, top to bottom), with the 1-sigma error associated to the super-observations as a grey shaded area (obs error). The top row features averages for Eastern China (a) and the province of Jilin (b), and the bottom row shows averages for the provinces of Beijing (c) and Shanghai (d). The NO<sub>2</sub> TVCDs are expressed in molecules.cm<sup>-2</sup>. Note that the y axis limits are different for the provinces as compared to Eastern China. The provinces are shown in Figure 1 on the map of the domain.



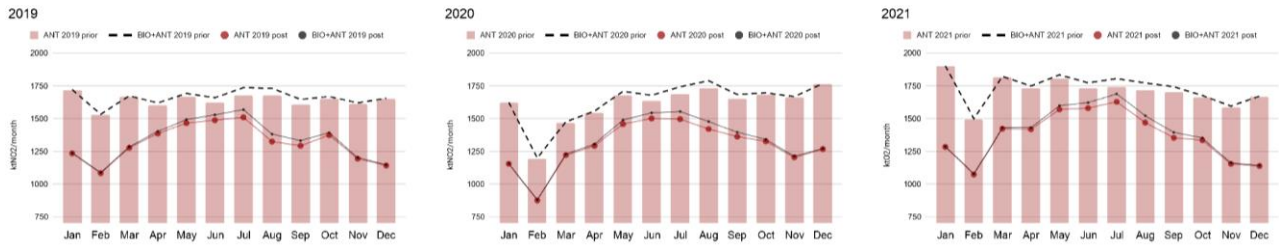

**Figure S7.** Anthropogenic (red) and total (black) NO<sub>x</sub> emissions for Eastern China, for 2019 to 2021 (left to right). The red bars represent the monthly prior anthropogenic emissions, the dotted black lines refer to the prior total emissions, the solid red lines refer to the anthropogenic posterior emissions, and the black solid lines refer to the total posterior emissions.

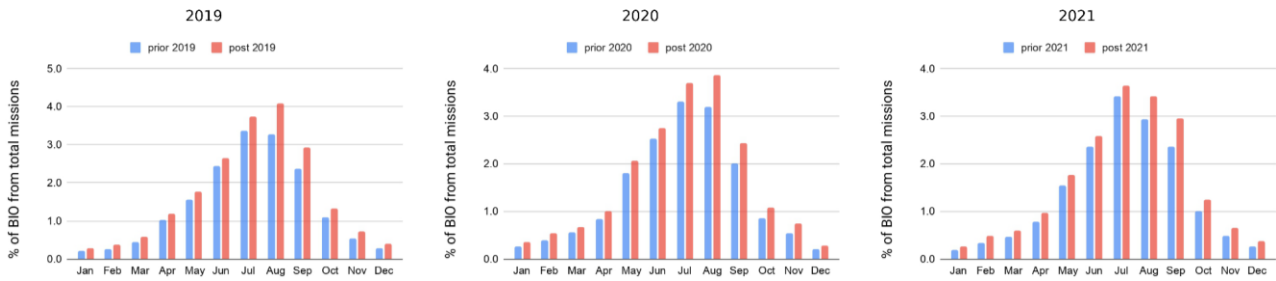

**Figure S8.** The percentage of the biogenic emissions from the total NO<sub>x</sub> emissions estimates, per month, for the prior (blue) and posterior (red) for 2019 to 2021 (left to right), in Eastern China.

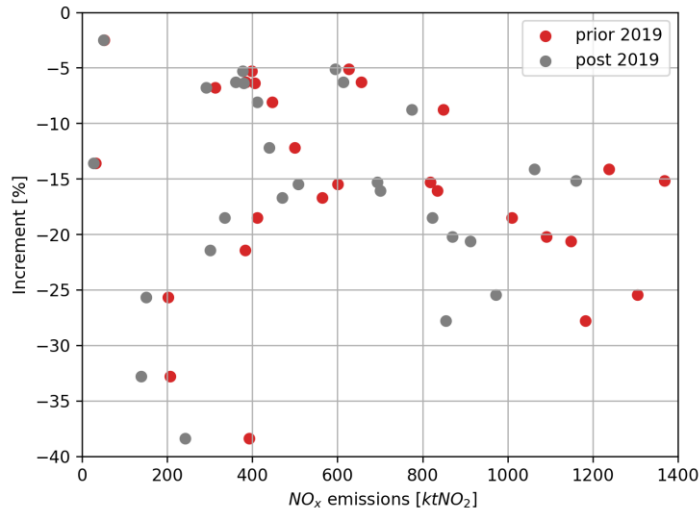

**Fig. S9.** Yearly increments (different between prior and posterior) vs. Prior (red) and posterior (grey) NO<sub>x</sub> emissions for 2019. The scatterpoints on the plot represent the Chinese provinces considered in this study, each row corresponds to one province.

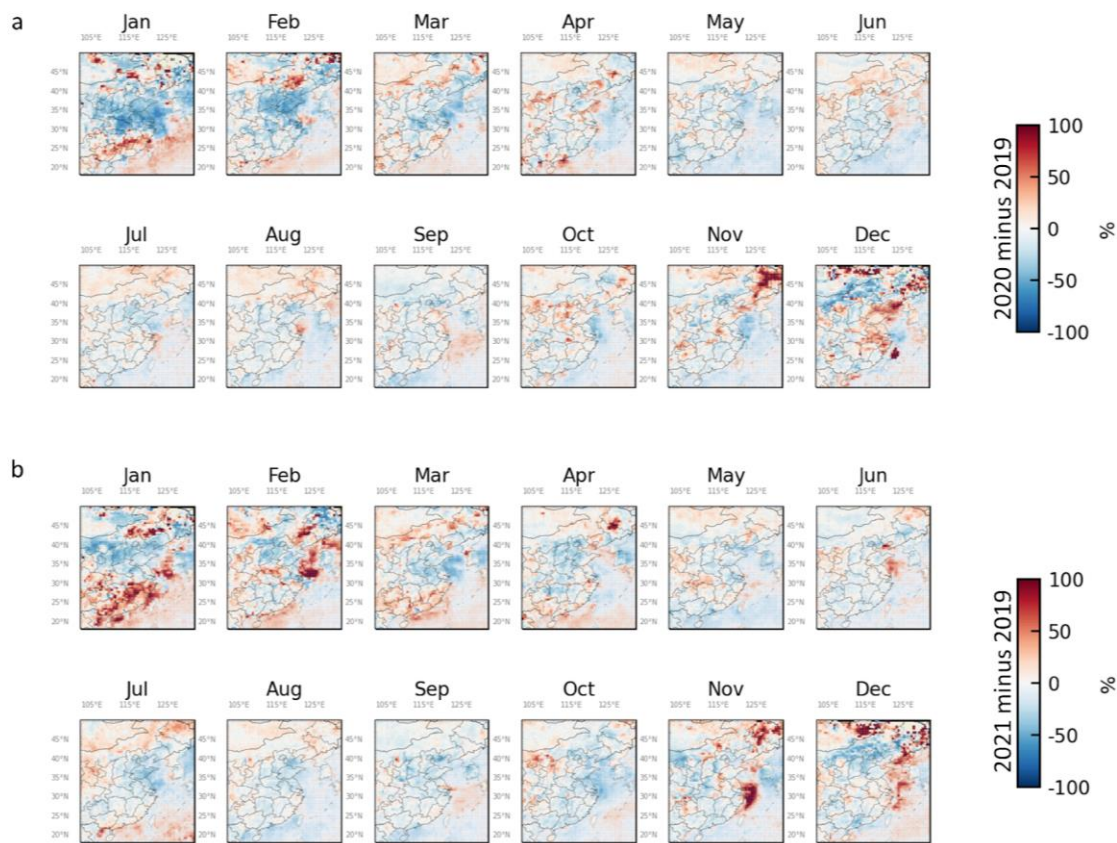

95

**Fig. S10.** Relative difference in the posterior NO<sub>2</sub> monthly TROPOMI TVCDs during 2020 (a) and 2021 (b) as compared to 2019, in %, over the domain of study. The horizontal resolution is  $0.5^\circ \times 0.5^\circ$  per grid box.



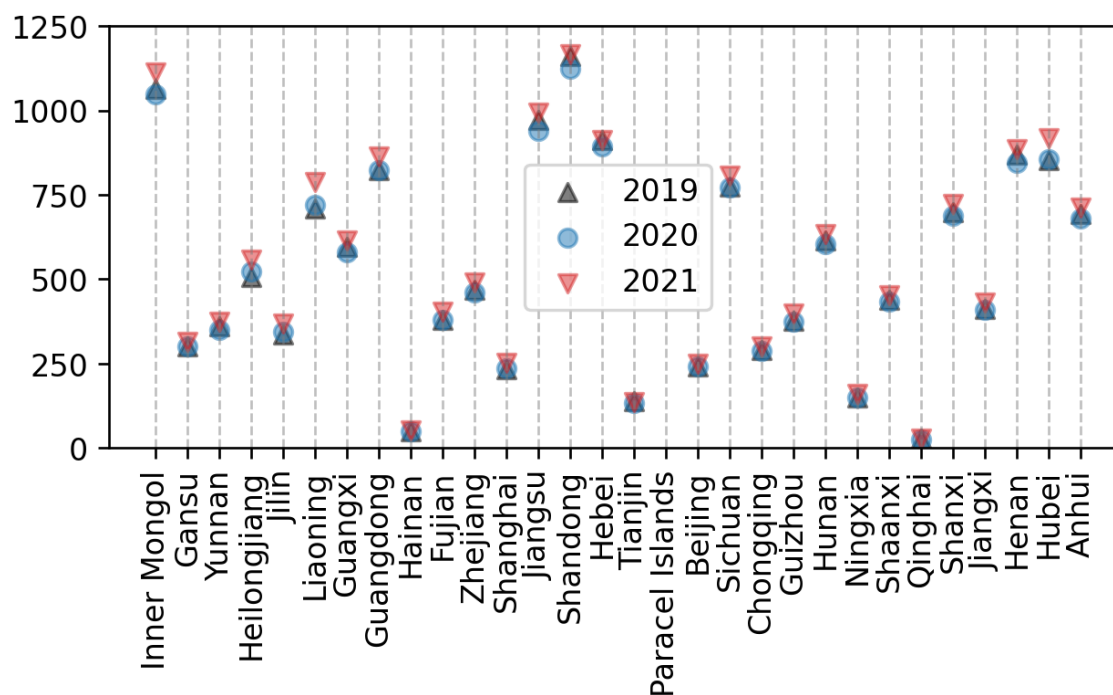

**Fig. S11.** Anthropogenic NO<sub>x</sub> emissions in ktNO<sub>2</sub>/year, per province, for the period 2019-2021.

**Table S1.** Anthropogenic NO<sub>x</sub> emissions per province, and the monthly and inter-annual change for the period 2019 – 2021: [https://docs.google.com/spreadsheets/d/1I2jQW6-ubCa-vq-aZDbCtA\\_DUrqYl\\_j2vAhBd7tjr4/edit?usp=sharing](https://docs.google.com/spreadsheets/d/1I2jQW6-ubCa-vq-aZDbCtA_DUrqYl_j2vAhBd7tjr4/edit?usp=sharing)

**Table S2.** Anthropogenic NO<sub>x</sub> emissions for the domain of study

| Domain    | 2019 prior | 2019 post | 2020 prior | 2020 post | 2021 prior | 2021 post |
|-----------|------------|-----------|------------|-----------|------------|-----------|
| January   | 2.10       | 1.55      | 2.00       | 1.47      | 2.28       | 1.60      |
| February  | 1.87       | 1.36      | 1.53       | 1.16      | 1.82       | 1.35      |
| March     | 2.05       | 1.61      | 1.81       | 1.54      | 2.2        | 1.76      |
| April     | 1.96       | 1.71      | 1.85       | 1.58      | 2.1        | 1.74      |
| May       | 2.04       | 1.82      | 2.00       | 1.76      | 2.17       | 1.91      |
| June      | 1.98       | 1.83      | 1.98       | 1.83      | 2.09       | 1.93      |
| July      | 2.06       | 1.87      | 2.05       | 1.84      | 2.11       | 1.98      |
| August    | 2.05       | 1.66      | 2.10       | 1.75      | 2.09       | 1.81      |
| September | 1.97       | 1.62      | 2.01       | 1.69      | 2.07       | 1.68      |
| October   | 2.03       | 1.72      | 2.05       | 1.66      | 2.03       | 1.66      |

|                                               |              |              |              |              |              |              |
|-----------------------------------------------|--------------|--------------|--------------|--------------|--------------|--------------|
| <b>November</b>                               | 1.98         | 1.51         | 2.02         | 1.51         | 1.94         | 1.46         |
| <b>December</b>                               | 2.03         | 1.45         | 2.14         | 1.57         | 2.04         | 1.43         |
| <b>Total Budget<br/>TgNO<sub>2</sub>/year</b> | <b>24.13</b> | <b>19.71</b> | <b>23.54</b> | <b>19.36</b> | <b>24.94</b> | <b>20.31</b> |
| TgN/year                                      | 7.34         | 6.00         | 7.16         | 5.89         | 7.59         | 6.18         |
| TgNO/year                                     | 15.74        | 12.86        | 15.36        | 12.63        | 16.27        | 13.25        |

110 **Table S3** Anthropogenic NO<sub>x</sub> emissions for Eastern China

| <b>China</b>                                  | 2019 prior   | 2019 post    | 2020 prior   | 2020 post    | 2021 prior   | 2021 post    |
|-----------------------------------------------|--------------|--------------|--------------|--------------|--------------|--------------|
| <b>January</b>                                | 1.72         | 1.23         | 1.62         | 1.15         | 1.9          | 1.28         |
| <b>February</b>                               | 1.53         | 1.08         | 1.19         | 0.87         | 1.49         | 1.07         |
| <b>March</b>                                  | 1.67         | 1.28         | 1.47         | 1.22         | 1.81         | 1.42         |
| <b>April</b>                                  | 1.6          | 1.39         | 1.54         | 1.29         | 1.74         | 1.42         |
| <b>May</b>                                    | 1.67         | 1.47         | 1.68         | 1.46         | 1.81         | 1.57         |
| <b>June</b>                                   | 1.62         | 1.49         | 1.64         | 1.5          | 1.73         | 1.58         |
| <b>July</b>                                   | 1.68         | 1.51         | 1.69         | 1.5          | 1.74         | 1.63         |
| <b>August</b>                                 | 1.67         | 1.32         | 1.73         | 1.42         | 1.72         | 1.47         |
| <b>September</b>                              | 1.61         | 1.29         | 1.65         | 1.36         | 1.7          | 1.35         |
| <b>October</b>                                | 1.65         | 1.37         | 1.68         | 1.33         | 1.66         | 1.34         |
| <b>November</b>                               | 1.61         | 1.19         | 1.66         | 1.2          | 1.59         | 1.15         |
| <b>December</b>                               | 1.65         | 1.14         | 1.76         | 1.27         | 1.67         | 1.14         |
| <b>Total Budget<br/>TgNO<sub>2</sub>/year</b> | <b>19.68</b> | <b>15.76</b> | <b>19.31</b> | <b>15.58</b> | <b>20.56</b> | <b>16.42</b> |
| TgN/year                                      | 5.99         | 4.80         | 5.88         | 4.74         | 6.26         | 5.00         |
| TgNO/year                                     | 12.84        | 10.28        | 12.6         | 10.17        | 13.42        | 10.71        |
